# Supplementary material for: De novo assembly of Agave sisalana transcriptome in response to drought stress provides insight into the tolerance mechanisms
Source: PubMed Central journal article supplement (PMC6344536; doi:10.1038/s41598-018-35891-6), 2019-01-23

**Supplementary information 1a and 1b:** (a) Illumina platform generated sequencing reads statistics. (b) Experimental Design for RNA-Seq data analysis under control and drought stress condition.

***De novo assembly of Agave sisalana transcriptome in response to drought stress provides insight into the tolerance mechanisms***

<sup>1,2</sup>Muhammad Bilal Sarwar, Zarnab Ahmad<sup>1</sup>, \* Bushra Rashid<sup>1</sup>, <sup>1</sup>Sameera Hassan, <sup>2</sup>Per L. Gregersen, <sup>2</sup>Maria De la O Leyva, <sup>2</sup>Istvan Nagy, <sup>2</sup>Torben Asp, <sup>1</sup>Tayyab Husnain

<sup>1</sup>Plant Genomics Lab, Center of Excellence in Molecular Biology, University of the Punjab, 87-West Canal Bank Road Thokar Niaz Baig, Lahore-53700, Pakistan.

<sup>2</sup>Department of Molecular Biology and Genetics, Aarhus University, Forsøgsvej 1, Slagelse Denmark.

\* **Corresponding author:** Bushra Rashid

**Tel.:** +92 (42) 35293141-46; **Fax:** +92 (42) 35293149

**E-mail:** [bushra.cemb@pu.edu.pk](mailto:bushra.cemb@pu.edu.pk)

| Sr No. | File | Name    | size<br>(GB) | total_length_of_read | Total reads | Total read bases<br>(bp) | GC (%) | AT(%) | Q20(%) | Q30(%) |
|--------|------|---------|--------------|----------------------|-------------|--------------------------|--------|-------|--------|--------|
| 1      | C1   | 1.fastq | 5.71         | 101                  | 43,520,248  | 4,395,545,048            | 48.6   | 51.4  | 97.899 | 96.406 |
| 2      |      | 2.fastq | 5.71         | 101                  |             |                          |        |       |        |        |
| 3      | C2   | 1.fastq | 7.07         | 101                  | 53,866,820  | 5,440,548,820            | 48.2   | 51.87 | 97.822 | 96.282 |
| 4      |      | 2.fastq | 7.07         | 101                  |             |                          |        |       |        |        |
| 5      | C3   | 1.fastq | 7.21         | 101                  | 55,165,992  | 5,571,765,192            | 48.07  | 51.93 | 97.745 | 96.135 |
| 6      |      | 2.fastq | 7.21         | 101                  |             |                          |        |       |        |        |
| 7      | T1   | 1.fastq | 5.8          | 101                  | 44,338,502  | 4,478,188,702            | 47.5   | 52.48 | 97.78  | 96.389 |
| 8      |      | 2.fastq | 5.8          | 101                  |             |                          |        |       |        |        |
| 9      | T2   | 1.fastq | 5.3          | 101                  | 40,564,456  | 4,097,010,056            | 48.1   | 51.9  | 97.737 | 96.123 |
| 10     |      | 2.fastq | 5.3          | 101                  |             |                          |        |       |        |        |
| 11     | T3   | 1.fastq | 5.15         | 101                  | 39,389,772  | 3,978,366,972            | 48.2   | 51.97 | 97.299 | 95.423 |
| 12     |      | 2.fastq | 5.15         | 101                  |             |                          |        |       |        |        |
| Total  |      |         | 72.49        | 101                  | 276,845,790 | 27,961,424,790           | 48.11  | 51.93 | 97.71  | 96.13  |

## Experimental Design and pipeline used in this study for RNA-Seq data analysis under control and drought stress condition.

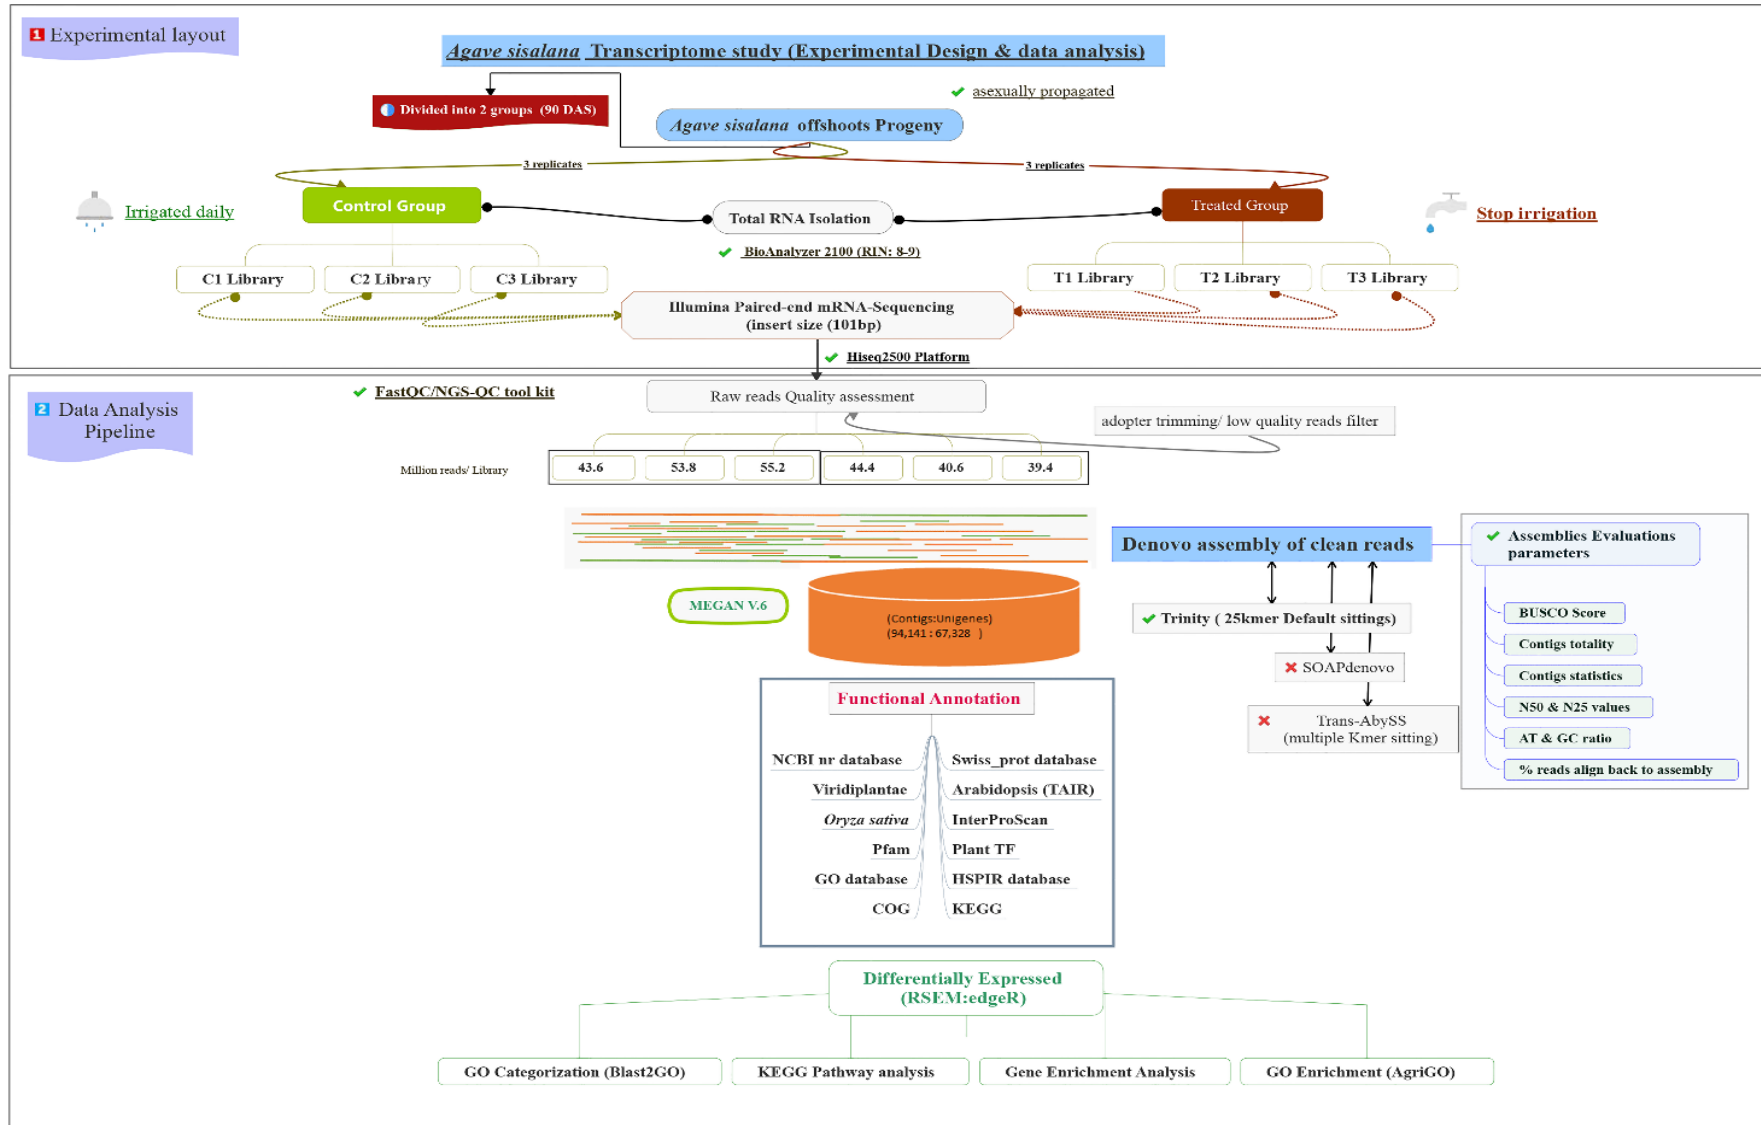

Supplement: 41598_2018_35891_MOESM1_ESM.pdf [file 41598_2018_35891_MOESM1_ESM.pdf]
