# Supplementary material for: De novo assembly of Agave sisalana transcriptome in response to drought stress provides insight into the tolerance mechanisms
Source: PubMed Central journal article supplement (PMC6344536; doi:10.1038/s41598-018-35891-6), 2019-01-23

**Supplementary** information 2: Statistics related to the differential gene expression including supportive graphs, differentially expressed gene homology against a different database and their functional annotation based on COG database.

## ***De novo assembly of Agave sisalana* transcriptome in response to drought stress provides insight into the tolerance mechanisms**

<sup>1,2</sup>Muhammad Bilal Sarwar, Zarnab Ahmad<sup>1</sup>, \* Bushra Rashid<sup>1</sup>, <sup>1</sup>Sameera Hassan, <sup>2</sup>Per L. Gregersen, <sup>2</sup>Maria De la O Leyva, <sup>2</sup>Istvan Nagy, <sup>2</sup>Torben Asp, <sup>1</sup>Tayyab Husnain

<sup>1</sup>Plant Genomics Lab, Center of Excellence in Molecular Biology, University of the Punjab, 87-West Canal Bank Road Thokar Niaz Baig, Lahore-53700, Pakistan.

<sup>2</sup>Department of Molecular Biology and Genetics, Aarhus University, Forsøgsvej 1, Slagelse Denmark.

\***Corresponding author:** Bushra Rashid

**Tel.:** +92 (42) 35293141-46; **Fax:** +92 (42) 35293149

E-mail: [bushra.cemb@pu.edu.pk](mailto:bushra.cemb@pu.edu.pk)

S1

| P-Value | Fold change | Total DEG | Up   | Down |
|---------|-------------|-----------|------|------|
| 0.05    | 1           | 8678      | 3989 | 4689 |
| 0.05    | 2           | 2249      | 761  | 1488 |
| 0.01    | 1           | 4616      | 1842 | 2774 |
| 0.01    | 2           | 1861      | 586  | 1275 |
| 0.001   | 1           | 3059      | 1195 | 1864 |
| 0.001   | 2           | 1474      | 472  | 1002 |
| 0.0001  | 1           | 2067      | 803  | 1264 |
| 0.0001  | 2           | 1184      | 399  | 785  |

S2

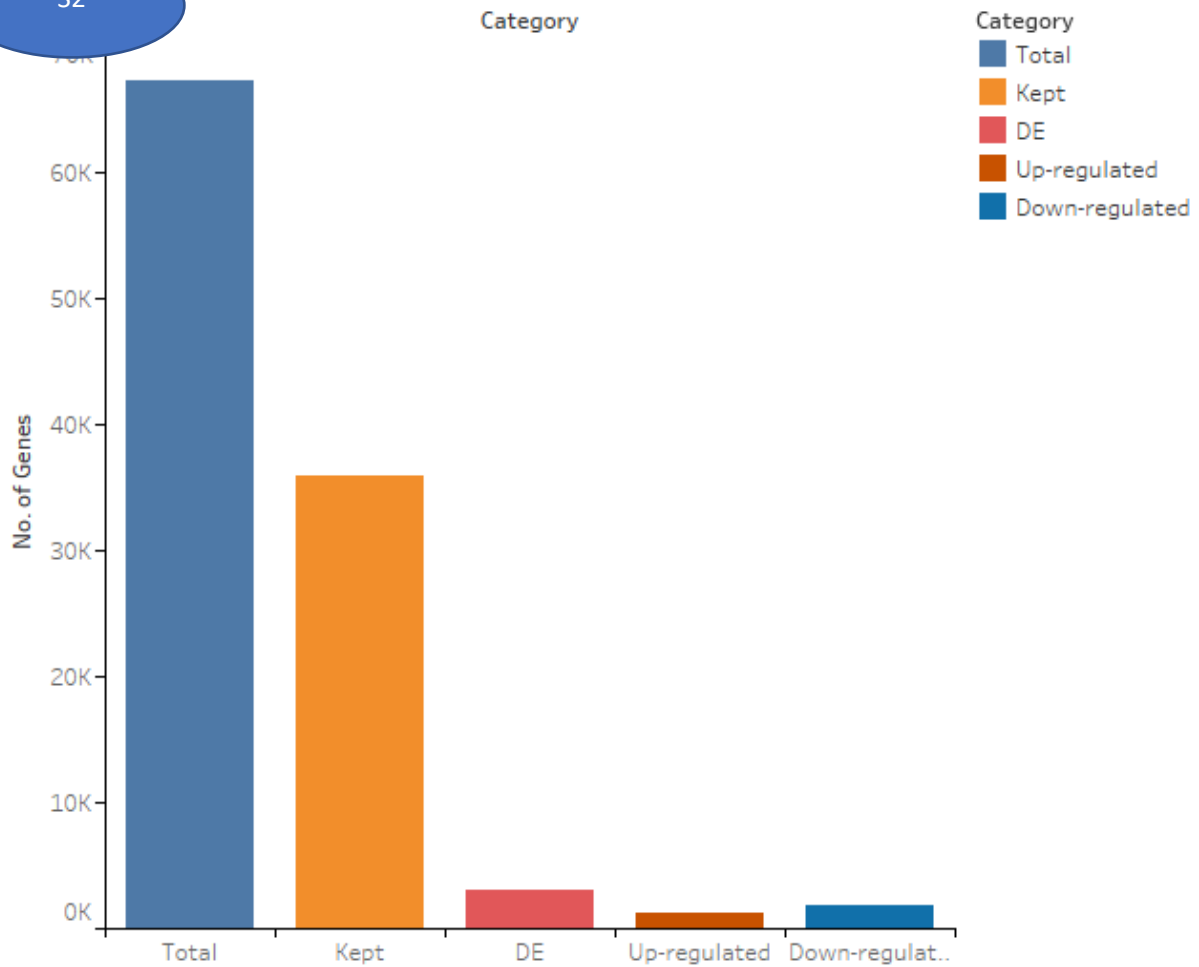

S3

Volcano plot [counts\_results]

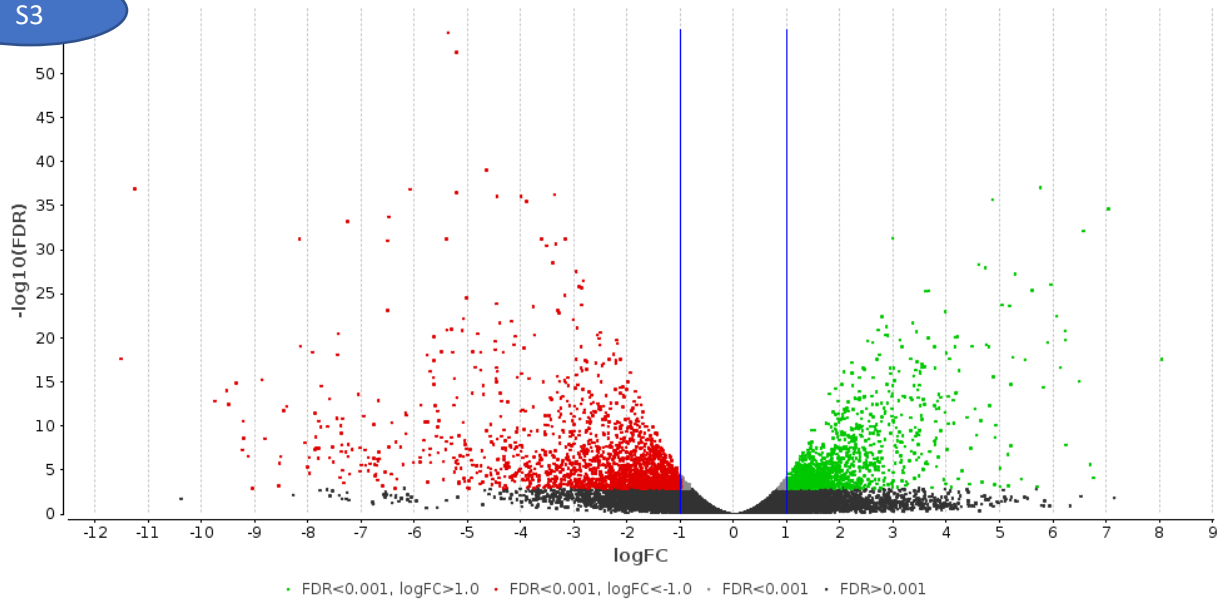

S4

MA plot [counts\_results]

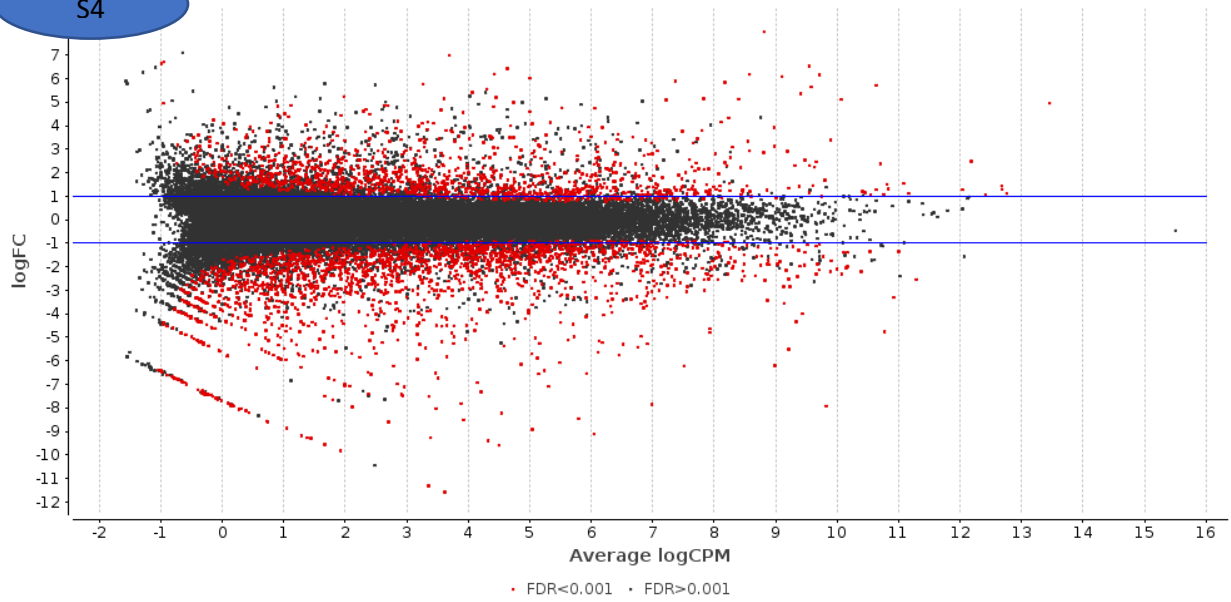

Supplement: 41598_2018_35891_MOESM2_ESM.pdf [file 41598_2018_35891_MOESM2_ESM.pdf]
