# Supplementary material for: De novo assembly of Agave sisalana transcriptome in response to drought stress provides insight into the tolerance mechanisms
Source: PubMed Central journal article supplement (PMC6344536; doi:10.1038/s41598-018-35891-6), 2019-01-23

**Supplementary** information 3: Pictorial representation of the offshoot of *A. sisalana* used for the leaves samplings.

***De novo assembly of Agave sisalana* transcriptome in response to drought stress provides insight into the tolerance mechanisms**

<sup>1,2</sup>Muhammad Bilal Sarwar, Zarnab Ahmad<sup>1</sup>, \* Bushra Rashid<sup>1</sup>, <sup>1</sup>Sameera Hassan, <sup>2</sup>Per L. Gregersen, <sup>2</sup>Maria De la O Leyva, <sup>2</sup>Istvan Nagy, <sup>2</sup>Torben Asp, <sup>1</sup>Tayyab Husnain

<sup>1</sup>Plant Genomics Lab, Center of Excellence in Molecular Biology, University of the Punjab, 87-West Canal Bank Road Thokar Niaz Baig, Lahore-53700, Pakistan.

<sup>2</sup>Department of Molecular Biology and Genetics, Aarhus University, Forsøgsvej 1, Slagelse Denmark.

\* **Corresponding author:** Bushra Rashid

**Tel.:** +92 (42) 35293141-46; **Fax:** +92 (42) 35293149

E-mail: [bushra.cemb@pu.edu.pk](mailto:bushra.cemb@pu.edu.pk)



S1

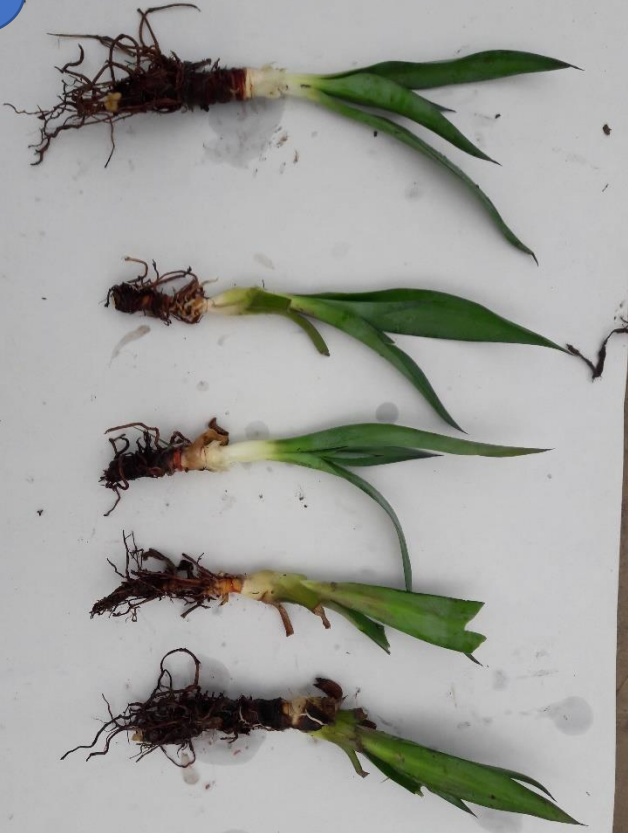

S1

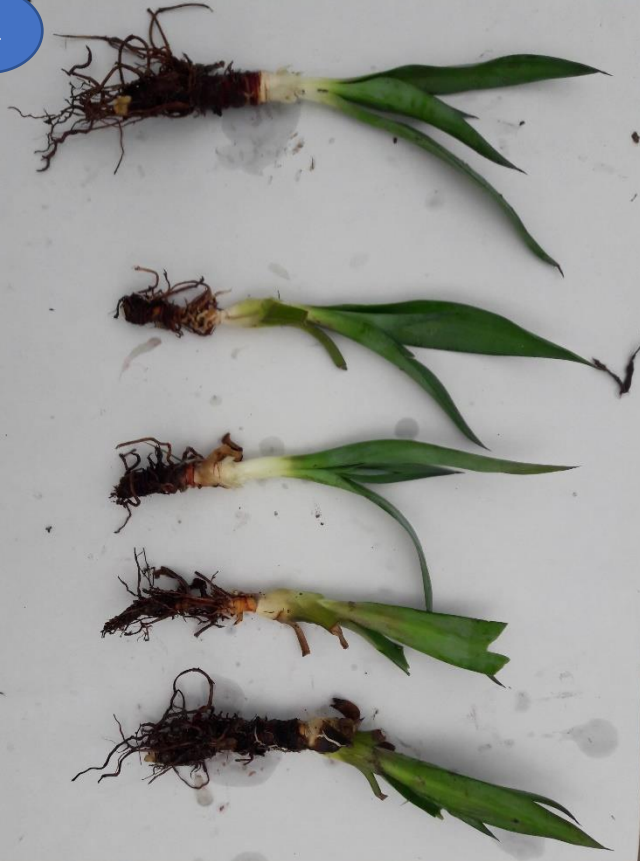

S1

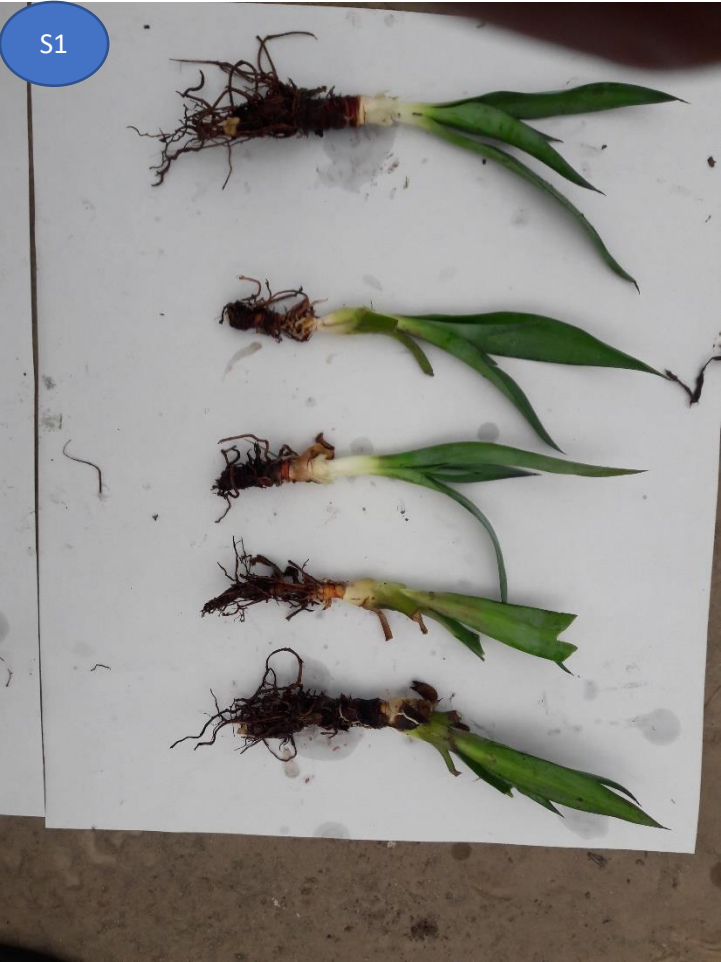

S2

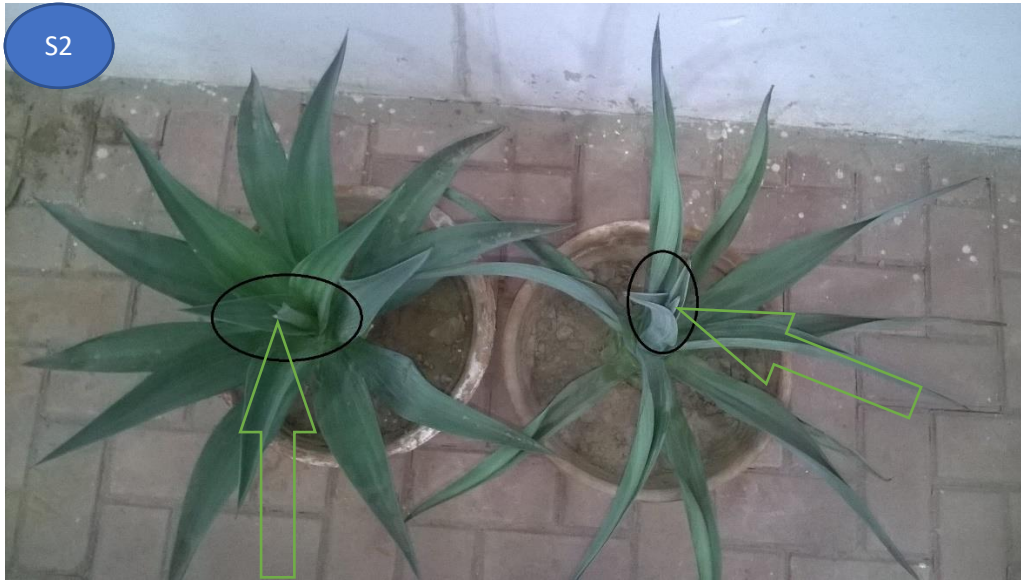

Supplement: 41598_2018_35891_MOESM3_ESM.pdf [file 41598_2018_35891_MOESM3_ESM.pdf]
