# Supplementary material for: De novo assembly of Agave sisalana transcriptome in response to drought stress provides insight into the tolerance mechanisms
Source: PubMed Central journal article supplement (PMC6344536; doi:10.1038/s41598-018-35891-6), 2019-01-23
Supplement: 41598_2018_35891_MOESM4_ESM.pdf [file 41598_2018_35891_MOESM4_ESM.pdf]

***Supplementary information 4: List of the primers used for RNA-Seq data validation by qPCR***

***De novo assembly of Agave sisalana transcriptome in response to drought stress provides insight into the tolerance mechanisms***

<sup>1,2</sup>Muhammad Bilal Sarwar, Zarnab Ahmad<sup>1</sup>, \* Bushra Rashid<sup>1</sup>, <sup>1</sup>Sameera Hassan, <sup>2</sup>Per L. Gregersen, <sup>2</sup>Maria De la O Leyva, <sup>2</sup>Istvan Nagy, <sup>2</sup>Torben Asp, <sup>1</sup>Tayyab Husnain

<sup>1</sup>Plant Genomics Lab, Center of Excellence in Molecular Biology, University of the Punjab, 87-West Canal Bank Road Thokar Niaz Baig, Lahore-53700, Pakistan.

<sup>2</sup> Department of Molecular Biology and Genetics, Aarhus University, Forsøgsvej 1, Slagelse Denmark.

\* **Corresponding author:** Bushra Rashid

**Tel.:** +92 (42) 35293141-46; **Fax:** +92 (42) 35293149

E-mail: [bushra.cemb@pu.edu.pk](mailto:bushra.cemb@pu.edu.pk)

Primers used for quantitative real time PCR analysis.

| <b>Sequence Definition</b> | <b>Sense Primer</b>      | <b>bp</b> | <b>Sequence Definition</b> | <b>Anti-sense Primer</b> | <b>bp</b> | <b>Amplicon Size</b> |
|----------------------------|--------------------------|-----------|----------------------------|--------------------------|-----------|----------------------|
| DN43992-F                  | CTTGAAATACCGAGGCAGTA     | 20        | DN43992-R                  | AGTGATTGAGGACATGAGTG     | 20        | 199                  |
| DN16778-F                  | GATGAAGTCTGGCGTCTC       | 18        | DN16778-R                  | TCCTCCCTCGTCTTCTTC       | 18        | 153                  |
| DN30560-F                  | TCTGAGGAGGAGAAGAGC       | 18        | DN30560-R                  | AGAGTGTGATGCCAGTTG       | 18        | 155                  |
| DN624-F                    | ATGAGCACCTTCAGTTGT       | 18        | DN624-R                    | CCAGTTGATGGACCTCTC       | 18        | 180                  |
| DN851-F                    | CCAGTGCCAGAGATAACG       | 18        | DN851-R                    | TTCGCCTTCCTTGACATAG      | 19        | 148                  |
| DN11256-F                  | TTCTGAGCAGAGCCTTCC       | 18        | DN11256-R                  | GAGTTGTGCCCGTTGTTG       | 18        | 132                  |
| DN22781-F                  | AGAAGGAAGAGGCGTTCA       | 18        | DN22781-R                  | GGCAGAGTTGTAGAGATGG      | 19        | 145                  |
| DN10658-F                  | GCTTCAGTTAAGTGAGTCCT     | 20        | DN10658-R                  | CGCTAGAGAGGCATACATAG     | 20        | 160                  |
| DN15873-F                  | CAGCCATCAGCAAGAACT       | 18        | DN15873-R                  | GAACCGTTAGAAGAGGAGAT     | 20        | 169                  |
| DN106-F                    | GCCTTCGACATCATCACTA      | 19        | DN106-R                    | CTCTCCGAGTCAACTATG       | 19        | 186                  |
| DN32793-F                  | TCTGAGGACTGCTGGAAT       | 18        | DN32793-R                  | GTCTTCTGAGCCTGATGTT      | 19        | 181                  |
| DN17539-F                  | CGCAATCAAGGCTCATCT       | 18        | DN17539-R                  | CACACGCTTCTCATACAATT     | 20        | 190                  |
| DN20046-F                  | ATCATCTCCTCCTTCTCT       | 20        | DN20046-R                  | TGCTGGTTCCTTCATAATCT     | 20        | 197                  |
| DN11176-F                  | TGTTATGTCGCTGTGAGTT      | 19        | DN11176-R                  | GAATCCTCTGTTGCTAATCG     | 20        | 193                  |
| DN22577-F                  | GGAGGAACCTAAGTGATGAGAT   | 21        | DN22577-R                  | AACAGTAACAGTGACGAGAT     | 20        | 169                  |
| DN7316-F                   | ATAACAGAGGACGGCATTG      | 19        | DN7316-R                   | TGGCGATTCAAGCACATT       | 18        | 191                  |
| DN29156-F                  | CAGGTGGAGAAGCATAGG       | 18        | DN29156-R                  | ACGACTGAACATCTGAGAA      | 19        | 188                  |
| DN15094-F                  | AACATACCGCTTCATATTGG     | 20        | DN15094-R                  | ATCATTGCTGTAGGAGAC       | 19        | 197                  |
| DN33670-F                  | GCCTAACTGAATCCTTGCTA     | 20        | DN33670-R                  | GCTCATACCTCTTACCGATAT    | 21        | 145                  |
| DN17132-F                  | GGTTCACCTAGCCACGATT      | 19        | DN17132-R                  | ATCCGAGAGCCTTGACAG       | 18        | 166                  |
| DN11424-F                  | CTCAATTCTCATTCCACCATC    | 21        | DN11424-R                  | TACATCTCCAACAACCTCAG     | 20        | 172                  |
| DN13837-F                  | CATTGCTTGCTTGCTCTC       | 18        | DN13837-R                  | TGACCTTCGGCTAGACAT       | 18        | 160                  |
| 18SrRNA-F                  | GGTCCAACCTACGAGCTTTTAACT | 24        | 18SrRNA-R                  | TTTtagccCGTTGCTCTGATG    | 21        | 180                  |
